# Supplementary material for: The MTNR1B rs10830963 Variant in Interaction with Pre-Pregnancy BMI is a Pharmacogenetic Marker for the Initiation of Antenatal Insulin Therapy in Gestational Diabetes Mellitus
Source: MDPI journal article supplement (doi:10.3390/ijms19123734), 2018-11-23
Supplement: s1 [file s1]

SUPPLEMENTARY TABLE 1:

| No of patients with GDM | Treatment modality in the pre-pregnancy BMI defined subgroup | <i>MTNR1B</i> rs10830963 genotype distribution in GDM patients with pre-pregnancy BMI < 27 kg/m <sup>2</sup> |    |    | Risk (G) allele frequency |
|-------------------------|--------------------------------------------------------------|--------------------------------------------------------------------------------------------------------------|----|----|---------------------------|
| 122                     | All                                                          | CC                                                                                                           | CG | GG | -                         |
| 11                      | AIT                                                          | 2                                                                                                            | 8  | 1  | 0.45                      |
| 111                     | Non-pharmacological treatment only                           | 45                                                                                                           | 51 | 15 | 0.36                      |
| No of patients with GDM | Treatment modality in the pre-pregnancy BMI defined subgroup | <i>MTNR1B</i> rs10830963 genotype distribution in GDM patients with pre-pregnancy BMI ≥ 27 kg/m <sup>2</sup> |    |    | Risk (G) allele frequency |
| 89                      | All                                                          | CC                                                                                                           | CG | GG | -                         |
| 20                      | AIT                                                          | 6                                                                                                            | 9  | 5  | 0.48                      |
| 69                      | Non-pharmacological treatment only                           | 35                                                                                                           | 28 | 6  | 0.29                      |
| No of patients with GDM | Treatment modality in the pre-pregnancy BMI defined subgroup | <i>MTNR1B</i> rs10830963 genotype distribution in GDM patients with pre-pregnancy BMI < 29 kg/m <sup>2</sup> |    |    | Risk (G) allele frequency |
| 148                     | All                                                          | CC                                                                                                           | CG | GG | -                         |
| 15                      | AIT                                                          | 5                                                                                                            | 8  | 2  | 0.40                      |
| 133                     | Non-pharmacological treatment only                           | 55                                                                                                           | 60 | 18 | 0.36                      |
| No of patients with GDM | Treatment modality in the pre-pregnancy BMI defined subgroup | <i>MTNR1B</i> rs10830963 genotype distribution in GDM patients with pre-pregnancy BMI ≥ 29 kg/m <sup>2</sup> |    |    | Risk (G) allele frequency |
| 63                      | All                                                          | CC                                                                                                           | CG | GG | -                         |
| 16                      | AIT                                                          | 3                                                                                                            | 9  | 4  | 0.53                      |
| 47                      | Non-pharmacological treatment only                           | 25                                                                                                           | 19 | 3  | 0.26                      |

The *MTNR1B* rs10830963 genotype distributions and the number of GDM subjects in the AIT / non-AIT treatment modality subgroups according to the pre-pregnancy BMI cutoffs of 27 kg/m<sup>2</sup> and 29 kg/m<sup>2</sup>.

Genotypes with the *risk allele G* are outlined in red colour.
