# Supplementary figures and images for: The MTNR1B rs10830963 Variant in Interaction with Pre-Pregnancy BMI is a Pharmacogenetic Marker for the Initiation of Antenatal Insulin Therapy in Gestational Diabetes Mellitus
Source: MDPI journal article supplement (doi:10.3390/ijms19123734), 2018-11-23

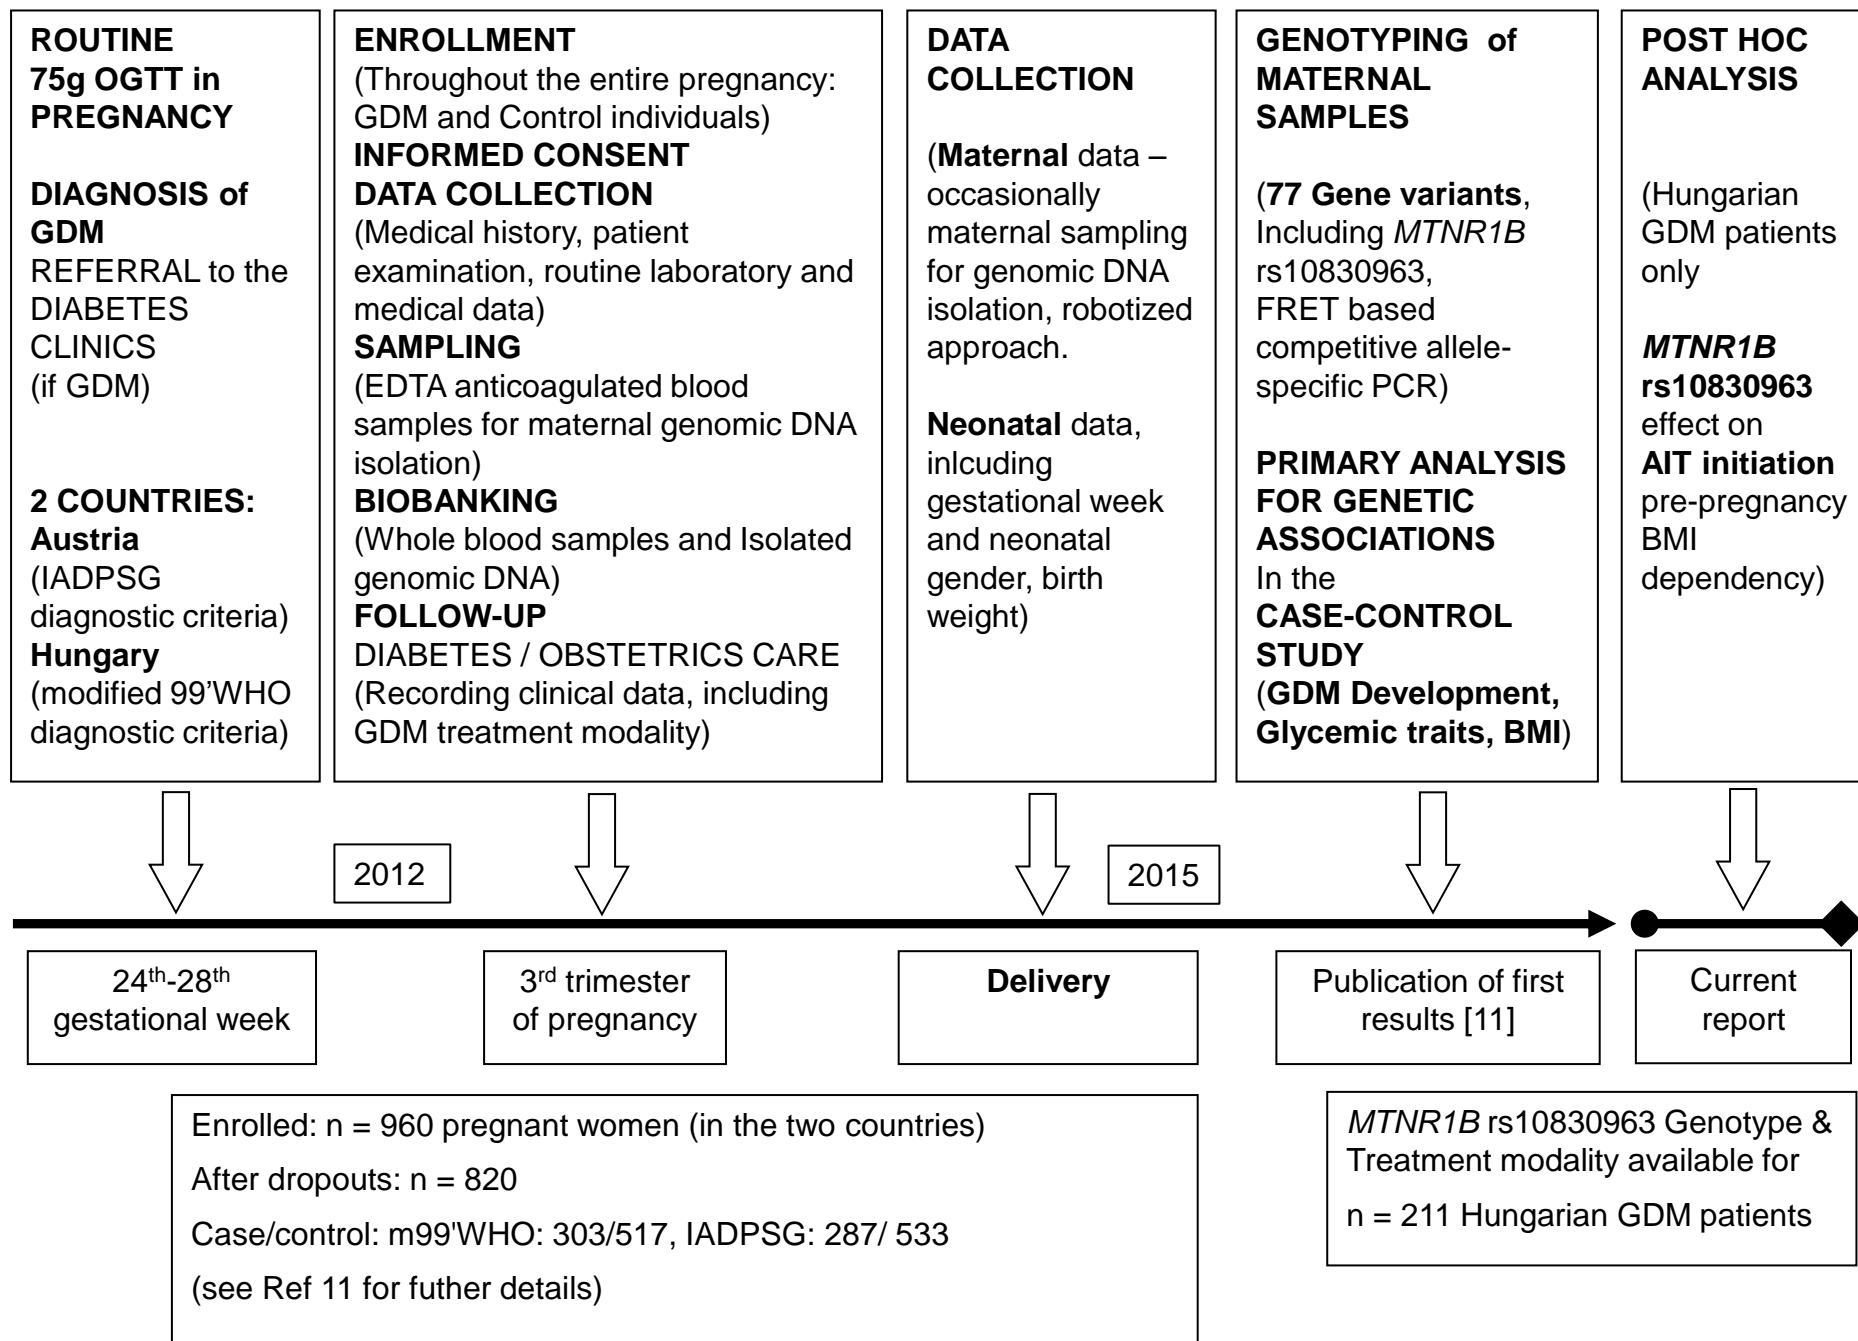

**Flow chart for the original case-control genetic study [11] and for this post hoc analysis**

Supplement: s1 [file s1]
